# Supplementary material for: Seasonal shifts in export of DOC and nutrientsfrom burned and unburned peatland-rich catchments, Northwest Territories, Canada
Source: Copernicus journal article supplement (doi:10.5194/hess-2018-253), 2018-05-15
Supplement: Supplementary file [file hess-2018-253-AC1-supplement.pdf]

We thank the two referees for their comments, which have allowed us to further improve a few key points and overall clarity of the manuscript. Below we outline our answers to both referees, with suggested changes indicated.

#### **Anonymous Referee #1**

**I recommend this paper for publication with minor revisions. This paper was enjoyable and provided a good comparison across DOC, N and P yields from a disturbed and undisturbed catchments with ~60% peatland cover using several different lines of evidence and analyses. The authors used fluorescence indices, <sup>14</sup>C dating of DOC, DOC, P and N to assess quantity (yields) and composition (DOC quality) of aqueous export from each catchment. The authors highlight the importance of catchment dynamics using end-member analysis, hysteresis, radiocarbon dating and by quantifying runoff and solute yields. Monitoring during spring freshet were shown as critically important to accurately characterize DOC and nutrient yields. The final conclusions stated in the manuscript suggest that climate change will alter DOC composition, and DOC and TN yield more than wildfire.**

**Although the study is interesting and illuminating in many respects, sentences are long and sometimes difficult to follow. Making some sentences (a few indicated below) more concise and targeted would clarify important messages for the reader.**

Our response: We have addressed all comments below, and will also go through the overall text to improve sentence clarity and brevity.

**There are no details about the fire in the disturbed Notawohka peatland (areal extent, severity/depth of burn) and this information would help contextualize the effects of wildfire on catchment yields. The omission of details about the specifics of wildfire occurrence in the Notawohka catchment is striking and should be included in the manuscript if this catchment is being directly compared to an 'undisturbed' catchment in each analysis.**

Our response: The fire burned between June 29 and August 20<sup>th</sup>, 2013, reaching an area of 967 km<sup>2</sup>, affecting ~90% of the Notawohka catchment. Since the fire burned over an extended period of time, there will have been highly variable weather conditions during this time affecting fire intensity. No fire severity analysis has been made of this fire in particular, but recent studies of depth of burn in the region has shown that there is substantial variability both between different ecosystems and within individual ecosystems types – even within a single fire scar (Walker et al., Global Change Biology, In press – available as Early View). Our field observations were limited to burned areas accessible by foot from the road, where we observed indicators of relatively low fire severity in the peat plateau that we visited. However, we can not determine whether this is representative of the fire severity throughout the catchment. We have added these sentences to the catchment description in the methods section:

*The NW outlet at the Mackenzie Highway (61°08 W, 120°17 N) has a 321 km<sup>2</sup> catchment that was >90% burned in 2013 (Northwest Territories Fire Scar Map, 2013). The fire burned a total area of 967 km<sup>2</sup>*

*between late June and mid-August, thus likely having variable fire severity within the fire scar (Xanthe et al., 2018).*

Specific comments:

**P3, L7-8: “Immediacy of links between terrestrial and aquatic biogeochemistry. . .” could be rewritten for clarification**

Our response: Sentence has been changed to: *However, DOC radiocarbon age further indicates whether links between terrestrial and aquatic biogeochemistry predominately act on short or long time scales.*

**P3, L10-11: Same as above. Very important message but lacks clarity.**

Our response: Sentence has been changed to: *Shifts in stream DOC composition may thus be as important for downstream ecosystems as a shift in catchment DOC export magnitude, and both aspects of catchment DOC export are potentially influenced both directly by climate change and indirectly e.g. through impacts of wildfire.*

**P3, L16: “generally cause increased. . .” – May not be the best word.**

Our response: Sentence has been changed to: *While fire is generally found to cause increased catchment export of total phosphorous in the boreal biome, observed impacts of fire on DOC and total dissolved nitrogen export include increases, decreases, and no change.*

**P3, L17-19: Awkward phrasing. Unclear.**

Our response: Sentence has been changed to, same as above: *While fire is generally found to cause increased catchment export of total phosphorous in the boreal biome, observed impacts of fire on DOC and total dissolved nitrogen export include increases, decreases, and no change*

**P5, L2: “mesic in wetness”?**

Our response: Sentence has been changed to: *Peat plateaus are relatively dry and dominated by black spruce (*Picea mariana*), Labrador tea (*Rhododendron groenlandicum*), and a variety of lichen species; thermokarst bogs have a water table 5 to 40 cm below the surface and support *Sphagnum* spp mosses and low shrubs, while channel fens have a persistent water table above the soil surface and vary from being dominated by sedges and other tall graminoids to being dominated by shrubs mostly from the genus *Betula**

**Page 5, L5: What does “carry fire well” mean?**

Our response: Sentence has been changed: *Neither thermokarst bogs nor channel fens burn readily well as they are wetter and lack trees, hence these ecosystems were largely unaffected by the fire that burned the Notawohka Creek catchment.*

**Page 7, L6: Reference for stannous chloride method**

Our response: Sentence has been changed: *An additional 8 samples were analysed photometrically (690 nm) for total phosphorous (TP) and total dissolved phosphorous (TDP) concentrations through stannous chloride method (Standard Method 4500-P:D).*

**Page 9, L5: What percentage of the peatland complex?**

Our response: Should not be relevant to results. Perhaps two thirds of this peatland complex was affected by fire. This peatland complex is ~3 km<sup>2</sup> large and just one of many in the region. No change made.

**Page 9, L21: “. . .stored dark and cool” – Odd phrase.**

Our response: Explanation added: *Pre-combusted bottles (0.5 L) were filled at each pit and then stored dark and cool to avoid photochemical or microbial degradation of DOC.*

**Page 12: Figures a), b), d), f) – Difficult to decipher symbols.**

Our response: Legends have been altered to more clearly show symbols.

**Page 15: b) – is it possible to get some transparency because superposition of data points blocks data pattern c) & d) the shading is confusing.**

Our response: We tried changing transparency in a) and b), but it does not improve clarity of the figures. The take-home message is that water type shifts from precip-dominated to groundwater-dominated, and the current style shows that. No change made. Shading in c) and d) is actually error-bars that indicate the 95% CI for the end-member mixing model for each half hour data, when all necessary data is available. We made changes to the figure legend to improve clarity of what the error bars indicate: *Error bars in a) and b) indicate the 95% CI of the end-member characteristics (see Methods for justification), while error bars in c) and d) indicate the 95% CI for fractional end-member contribution to streamflow based on Eqs. 1 – 3 and the uncertainty of the end-member characterization.*

**Technical corrections (typos):**

**Page 2, L24: change order of references according to date to coincide with rest of paper**

Our response: Done.

**Page 3, L7: mean to means (typo), possibly change “. . .contributing sources..” to “. . .sources contributing to. . .”**

Our response: Sentence has been changed to: *Different catchment DOC sources may also vary in terms of radiocarbon (<sup>14</sup>C) age (Raymond et al., 2007), and thus provides another means to differentiate between sources contributing to catchment DOC export.*

**Page 9, L8: Remove “,” after “stream water samples. . .”**

Our response: Done.

**Page 9, L16: Add colon after “occasions in 2017:. . .”**

Our response: Done.

**Page, L18: Add period after “for 4 h). “**

Our response: Done.

**Page 9, L21: “stored dark and cool” sounds awkward.**

Our response: Sentence changed: *Pre-combusted bottles (0.5 L) were filled at each pit and then stored dark and cool to avoid photochemical or microbial degradation of DOC.*

**Page 3, L22: remove “,” in the sentence “. . .the permafrost, i.e. the active layer, (Gibson..” add comma (Gibson et al., In review),”**

Our response: Done.

**Page 3,L23: Add “a” after “. . .this region may exhibit a characteristic response. . .”**

Our response: Done.

**Page 10, L15: Reference for Scotty Creek catchment weather could be improved.**

Our response: Reference changed to: *(Data available through the Government of Canada, Environment and Climate Change Canada: [climate.weather.gc.ca](http://climate.weather.gc.ca))*

**Page 14, L25: Remove ‘shifts” after A254 ?**

Our response: Done.

## **Anonymous Referee #2**

**General comment: In this study, researchers from Canada qualitatively characterized DOC, and compared yields of DOC and nutrients from two boreal peatland catchments from early spring to autumn. The two peatland catchments differed in terms of flow and disturbance regimes (wildfire). Major findings of this study are that 1) the two catchments showed strong similar DOC and nutrient exports. 2) more than half of the exported DOC and phosphorus occurred during spring, with the rising limb of the freshet linked to higher phosphorus concentrations and DOC of higher molecular weight. 3) the burned catchment had significantly increased total phosphorus and DOC yield. The main conclusion of the study was that predicted changes in runoff may be more important for the DOC character and export from boreal peatlands than wild fires. This is an interesting and important study, and the manuscript is in very good shape. I strongly recommend this manuscript to be** Our response:

**published with minor revisions.**

Questions:

**1-Page 4, lines 10, 11 and 12- “The SC outlet at the Liard Highway (61°24 W, 121°26 N) has a 134 km<sup>2</sup> catchment that has not been affected by any major fires in the last 60 years. The NW outlet at the Mackenzie Highway (61°08 W, 120°17 N) has a 321 km<sup>2</sup> catchment that was >90% burned in 2013 (Northwest Territories Fire Scar Map, 2013).” Is it possible that difference in catchment size affected the export of DOC and nutrients from peatlands? Typically, large forested catchments drain deeper soil layers, resulting in lower exports of DOC and TDN. Therefore, could catchment size influence the DOC and nutrient yields from peatland catchments?**

Our response: Yes, catchment size may influence catchment DOC export, largely thought to be due to increased DOC losses within aquatic (streams/rivers/lakes) ecosystems due to microbial and photochemical losses. Usually this also includes a selective removal of aromatic DOC due to flocculation and photochemical transformations. I have seen no studies linking catchment size and depth of flow-paths to decreased DOC export. That said, the influence of catchment size is generally only a dominant factor for stream DOC characteristics when comparing systems where catchment size or water retention time differ by several order of magnitude (e.g. see Catalan et al 2016, Nature Geoscience). In this case, the difference between a 134 and a 321 km<sup>2</sup> catchment may not be enough to see this effect clearly. Also, if difference in catchment size was a dominant control on catchment DOC export, then we would expect the Notawohka catchment to have higher DOC export and higher DOC aromaticity than the Scotty Creek catchment, which is not the case in this study.

A general point here is that we cannot, and do not try to, attribute differences between the Scotty Creek and Notawohka Creek solute export patterns solely to effects of wildfire. That Notawohka was recently affected by wildfire is only one of the several differences between these catchments. That said, we think that the catchment have sufficient similarities in size and land cover composition that we can discuss which differences in solute export patterns between these catchments that are more likely to be due to wildfire. Hence the comparison with the soil pore water, which allows us to say whether differences at the catchment outlets are consistent with observed shifts in soil porewater or peatland hydrology.

**2-This comment is also related to catchment size: is it possible that differences in catchment size influenced the DOC yields (due to microbial respiration during different water transit times)?**

Our response: See above.

**Technical corrections/suggestions:**

**1-Optional idea: Page 8, line 5- “(R<sup>2</sup> = 0.71, p < 0.005).” and so forth. -You may add sample size.**

Our response: We have added:  $n = 16$

**2-Page 8, line 5- Replace estimated by estimates.**

Our response: Done.

**3-Page 18, line 1- Replace 4.3 by 4.1.**

Our response: Done.
